# Supplementary material
Source: MDPI journal article supplement (https://www.mdpi.com/2037-0164/13/2/5)
Supplement: s1 [file s1]

**Table S1.** Principal component eigenvector, eigenvalue, contribution rate and accumulative contribution rate of eight tartary buckwheat varieties at flowering stage.

| Indicators                        | Main composition |        |
|-----------------------------------|------------------|--------|
|                                   | PC1              | PC2    |
| EE                                | 0.829            | 0.421  |
| NDF                               | -0.794           | -0.249 |
| NFE                               | -0.789           | 0.093  |
| calcium                           | 0.750            | -0.548 |
| ADF                               | -0.718           | 0.648  |
| phosphorus                        | 0.640            | -0.390 |
| rutin                             | 0.460            | 0.828  |
| total flavonoids                  | 0.485            | 0.809  |
| CF                                | 0.283            | -0.493 |
| CP                                | 0.481            | 0.037  |
| Eigenvalue                        | 4.184            | 2.705  |
| Contribution rate (%)             | 41.839           | 27.049 |
| Cumulative contribution ratio (%) | 41.839           | 68.888 |

PC: principal components; CP: crude protein; CF: crude fiber; EE: crude fat, ether extract; ADF: acid detergent fiber; NDF: neutral detergent fiber; NEF: nitrogen free extract.

**Table S2.** Principal component eigenvector, eigenvalue, contribution rate and accumulative contribution rate of eight tartary buckwheat varieties at pustulation stage.

| Indicators                        | Main composition |        |
|-----------------------------------|------------------|--------|
|                                   | PC1              | PC2    |
| NFE                               | -0.888           | 0.336  |
| NDF                               | -0.832           | 0.210  |
| CP                                | 0.691            | -0.183 |
| CF                                | 0.638            | 0.373  |
| rutin                             | 0.329            | 0.829  |
| total flavonoids                  | 0.530            | 0.744  |
| EE                                | 0.448            | -0.716 |
| phosphorus                        | 0.144            | 0.249  |
| ADF                               | -0.263           | 0.256  |
| calcium                           | -0.362           | -0.128 |
| Eigenvalue                        | 3.177            | 2.226  |
| Contribution rate (%)             | 31.768           | 22.257 |
| Cumulative contribution ratio (%) | 31.768           | 54.025 |

PC: principal components; CP: crude protein; CF: crude fiber; EE: crude fat, ether extract; ADF: acid detergent fiber; NDF: neutral detergent fiber; NEF: nitrogen free extract.

**Table S3.** Principal component eigenvector, eigenvalue, contribution rate and accumulative contribution rate of eight tartary buckwheat varieties at mature stage.

| Indicators       | Main composition |        |
|------------------|------------------|--------|
|                  | PC1              | PC2    |
| calcium          | 0.864            | 0.051  |
| CF               | -0.86            | -0.106 |
| EE               | 0.854            | -0.39  |
| total flavonoids | 0.709            | 0.35   |
| NFE              | 0.702            | -0.21  |
| phosphorus       | 0.682            | 0.181  |
| NDF              | -0.45            | 0.427  |

|                                   |        |        |
|-----------------------------------|--------|--------|
| CP                                | 0.187  | 0.896  |
| ADF                               | 0.323  | 0.801  |
| rutin                             | 0.376  | -0.693 |
| Eigenvalue                        | 4.160  | 2.472  |
| Contribution rate (%)             | 41.602 | 24.717 |
| Cumulative contribution ratio (%) | 41.602 | 66.319 |

PC: principal components; CP: crude protein; CF: crude fiber; EE: crude fat, ether extract; ADF: acid detergent fiber; NDF: neutral detergent fiber; NEF: nitrogen free extract.

**Table S4.** Comprehensive scoring of principal component values of eight tartary buckwheat varieties at flowering stage.

| Varieties | Score  |        |        | Rank |
|-----------|--------|--------|--------|------|
|           | F1     | F2     | Dn     |      |
| M-09125   | -1.231 | -2.395 | -1.107 | 8    |
| XQ-1      | 0.494  | -0.234 | 0.132  | 4    |
| BY        | -0.414 | 0.072  | -0.135 | 6    |
| EWPS      | 0.143  | 0.973  | 0.300  | 3    |
| ZK-1      | 0.044  | 0.182  | 0.011  | 5    |
| PS-07     | 0.073  | 1.101  | 0.506  | 2    |
| CQ-3      | 1.383  | 1.150  | 0.627  | 1    |
| YQ-1      | -0.492 | -0.849 | -0.424 | 7    |

M-09125: Meng-09125; XQ-1: Xiqiao No.1; BY: Buyue; EWPS: Ewu Pedgree selection; ZK-1: Zhaoku No.1; PS-07: Pedgree selection-07; CQ-3: Chuanqiao No.3 and YQ-1: Youqiao No.1.

**Table S5.** Comprehensive scoring of principal component values of eight tartary buckwheat varieties at pustulation stage.

| Varieties | Score  |        |        | Rank |
|-----------|--------|--------|--------|------|
|           | F1     | F2     | Dn     |      |
| M-09125   | 0.192  | 2.008  | 0.832  | 1    |
| XQ-1      | 0.844  | -2.742 | -0.218 | 7    |
| BY        | 3.116  | 0.435  | 0.113  | 4    |
| EWPS      | -0.310 | -0.729 | -0.629 | 8    |
| ZK-1      | -0.725 | 0.173  | 0.133  | 2    |
| PS-07     | -1.341 | 0.973  | -0.190 | 6    |
| CQ-3      | -2.261 | -0.629 | -0.115 | 5    |
| YQ-1      | 0.485  | 0.511  | -0.022 | 3    |

M-09125: Meng-09125; XQ-1: Xiqiao No.1; BY: Buyue; EWPS: Ewu Pedgree selection; ZK-1: Zhaoku No.1; PS-07: Pedgree selection-07; CQ-3: Chuanqiao No.3 and YQ-1: Youqiao No.1.

**Table S6.** Comprehensive scoring of principal component values of eight tartary buckwheat varieties at mature stage.

| Varieties | Score  |        |        | Rank |
|-----------|--------|--------|--------|------|
|           | F1     | F2     | Dn     |      |
| M-09125   | -1.357 | -0.951 | -0.933 | 6    |
| XQ-1      | 0.065  | 1.547  | 0.536  | 2    |
| BY        | -1.443 | -1.242 | -0.961 | 7    |
| EWPS      | 0.485  | 0.647  | 0.326  | 5    |
| ZK-1      | 0.490  | 0.679  | 0.371  | 4    |
| PS-07     | 1.167  | 0.266  | 0.452  | 3    |
| CQ-3      | 1.998  | 0.902  | 1.050  | 1    |
| YQ-1      | -1.405 | -1.848 | -0.995 | 8    |

M-09125: Meng-09125; XQ-1: Xiqiao No.1; BY: Buyue; EWPS: Ewu Pedgree selection; ZK-1: Zhaoku No.1; PS-07: Pedgree selection-07; CQ-3: Chuanqiao No.3 and YQ-1: Youqiao No.1.
